# Supplementary material
Source: PubMed Central journal article supplement (PMC2952554)
Supplement: supp_M006353_jlr.M006353-1.pdf [file supp_M006353_jlr.M006353-1.pdf]

Supplemental TABLE S1. Relative amounts of mRNAs in livers and jejunum from L1-KO mice as compared with values in WT mice

---

|                                         | Relative amount<br>in L1-KO mice |
|-----------------------------------------|----------------------------------|
| <b>Hepatic cholesterol biosynthesis</b> |                                  |
| SREBP-2                                 | 0.81                             |
| HMG-CoA Reductase                       | 1.43                             |
| HMG-CoA synthase                        | 1.85                             |
| Squalene synthase                       | 1.3                              |
| <b>Intestinal lipid metabolism</b>      |                                  |
| HMG-CoA synthase                        | 1.23                             |
| ABCA1                                   | 0.23                             |
| Fatty acid transport protein 4          | 0.62                             |
| Cluster Determinant (CD) 36             | 0.29                             |

---

Mice were fed HFD for 24 weeks. Total RNAs were extracted from each liver tissue or jejunal tissue (the second proximal segment of 5 equal segments of the whole small intestine). The equal amount of total RNAs from each tissue in each group (n = 6) was pooled and subjected to qPCR as described under Methods. Cyclophilin was used as the internal control. Values represent the amount of mRNA relative to that in WT mice, which is arbitrarily defined as 1. ABCA1, ATP-binding cassette transporter A1

Supplemental TABLE S2. Relative amounts of mRNAs in livers from L1-KO mice as compared with values in WT mice

|                                           | Relative amount<br>in L1-KO mice |
|-------------------------------------------|----------------------------------|
| <b>Lipogenesis</b>                        |                                  |
| Acetyl CoA carboxylase                    | 0.54                             |
| Fatty acid synthase                       | 0.34                             |
| Malic enzyme                              | 0.58                             |
| Stearoyl-CoA desaturase-1                 | 0.4                              |
| Glycerol-3-phosphate acyltransferase 1    | 0.48                             |
| Glucokinase                               | 0.32                             |
| <b>Glucose metabolism</b>                 |                                  |
| ChREBP                                    | 0.83                             |
| Glucose-6-phosphatase                     | 0.7                              |
| Phosphoenolpyruvate carboxykinase         | 0.94                             |
| <b>Fatty acid oxidation</b>               |                                  |
| PPAR $\alpha$                             | 0.72                             |
| PGC-1 $\alpha$                            | 0.88                             |
| PGC-1 $\beta$                             | 1.28                             |
| Acyl-CoA oxidase                          | 0.45                             |
| Carnitine palmitoyltransferase-1 $\alpha$ | 0.43                             |
| <b>LXR target genes</b>                   |                                  |
| ABCG5                                     | 0.52                             |
| Phospholipid transfer protein             | 0.66                             |

Mice were fed HFD for 24 weeks. Total RNAs were extracted from each liver tissue and the equal amount of total RNAs from each sample in each group (n = 6) was pooled and subjected to qPCR as described under Methods. Cyclophilin was used as the invariant control. Values represent the amount of mRNA relative to that in WT mice, which is arbitrarily defined as 1. ABCG5, ATP-binding cassette transporter G5; PPAR, peroxisome proliferator-activated receptor; PGC, PPAR gamma coactivator
